# Supplementary material for: Structure, interaction and nervous connectivity of beta cell primary cilia
Source: PubMed Central journal article supplement (PMC11502866; doi:10.1038/s41467-024-53348-5), 2024-10-24
Supplement: 41467_2024_53348_MOESM3_ESM.pdf [file 41467_2024_53348_MOESM3_ESM.pdf]

### **Description of Additional Supplementary Files**

**Supplementary Movie 1:** 3D rendering of mouse beta cell cilium within islet tissue.

**Supplementary Movie 2:** Raw ssET of a human beta cell primary cilium.

**Supplementary Movie 3:** FIB-SEM + Axoneme reconstruction of a mouse beta cell primary cilium.

**Supplementary Movie 4:** Spatial restriction of beta cell primary cilia.

**Supplementary Movie 5:** Beta cell axo-ciliary synapse.
